# Supplementary material for: Sodium Current Reduction Unmasks a Structure-Dependent Substrate for Arrhythmogenesis in the Normal Ventricles
Source: PubMed Central journal article supplement (PMC3904970; doi:10.1371/journal.pone.0086947), 2014-01-28
Supplement: pone.0086947.s001.pdf [file pone.0086947.s001.pdf]

**Sodium current reduction unmasks a structure-dependent substrate for arrhythmogenesis in the normal ventricles**

Patrick M. Boyle<sup>1†</sup>, Carolyn J. Park<sup>1†</sup>, Hermenegild J. Arevalo<sup>1</sup>,  
Edward J. Vigmond<sup>2</sup>, Natalia A. Trayanova<sup>1\*</sup>

1: Institute for Computational Medicine, Department of Biomedical Engineering, Johns Hopkins University, Baltimore, USA.

2: Institut LIRYC, Université Bordeaux 1, Bordeaux, France.

†: The first two authors contributed equally to this work.

\*: Corresponding author: NA Trayanova, Phone: 410-516-4375,  
Fax: 410-516-5294, Email: ntrayanova@jhu.edu Mail: 3400 N Charles  
Street – 316 Hackerman Hall – Baltimore MD 21218 – USA

# **SUPPORTING FILE S1**

Figure S1:

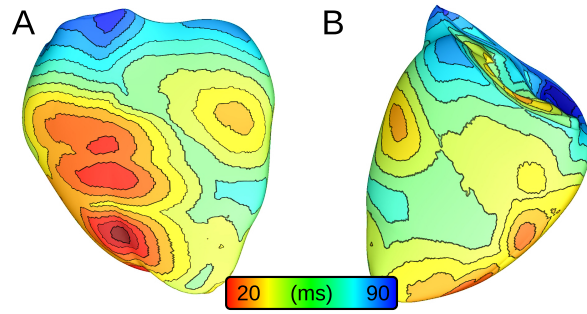

Figure S2:

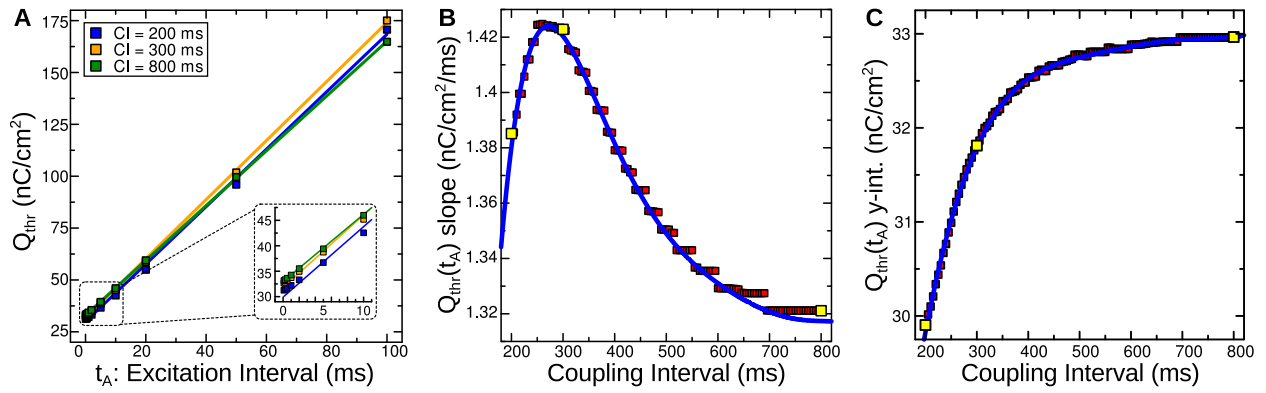

**Table S1:**

| <b>Mesh Resolution (<math>\mu\text{m}</math>)</b> | <b>Conduction Velocity Along Wedge (<math>\text{cm/s}</math>)</b> | <b>Percent Difference (compared to highest-resolution model)</b> |
|---------------------------------------------------|-------------------------------------------------------------------|------------------------------------------------------------------|
| 500                                               | 19.24                                                             | 42.5%                                                            |
| 250                                               | 30.60                                                             | 8.79%                                                            |
| 125                                               | 33.09                                                             | 1.37%                                                            |
| 62.5                                              | 33.55                                                             | N/A                                                              |

**Table S2:**

| <b>Category</b>                            | <b>Parameter(s)</b>                   | <b>Value</b>         |
|--------------------------------------------|---------------------------------------|----------------------|
| Geometry                                   | # of degrees of freedom (nodes)       | 843,507              |
|                                            | # tetrahedral elements                | 4,744,512            |
|                                            | mean element edge length              | 261.76 $\mu\text{m}$ |
| Monodomain conductivity ( $\text{mS/mm}$ ) | longitudinal ( $\sigma_{\text{mL}}$ ) | 0.1845               |
|                                            | transverse ( $\sigma_{\text{mT}}$ )   | 0.02376              |
|                                            | normal ( $\sigma_{\text{mN}}$ )       | 0.02376              |
| Computation                                | # of Intel X5660 CPUs @ 2.80 GHz      | 12                   |
|                                            | wall time to simulate 1 second        | 2h07m                |

## Appendix:

```
#####
# Pseudocode for calculation of cardiac safety factor (SF) #
# as described in Boyle, Park et al. (2013). #
# #
# This is an improved version of the formulation presented in #
# Boyle & Vigmond (2010) Biophys J. Note that a correction to #
# that paper was published in the December 2013 issue of the #
# same journal (please see: http://goo.gl/DdHz0e). #
# #
# The process outlined here is for a single node but can be #
# extended to deal with arbitrary geometry, as in the paper. #
#####

BEGIN CalcSF

  SET Vm = read_file( Vm_file ) # transmembrane voltage data over time
  SET Iion = read_file( Iion_file ) # ionic current data over time

  SET dt = 0.1 # global time step between data values
  SET last_act = ... # the previous activation time for this node

  # First, compute Im = Cm dVm/dt + Iion:
  SET Im = compute_Im( Vm, Iion, dt )
  # Note 1: current units: uA/cm2, voltage units: mV
  # Note 2: reduces to a simple sum since Cm = 1 uF/cm2
  # Note 3: use forward differencing to compute dVm/dt

  # Second, identify the first interval during which Vm is
  # above some empirically-defined threshold, e.g. -85 mV:
  SET Vm_thr = -85
  SET i_depol = -1
  SET i_repol = -1
  FOREACH Vmi in Vm,
    IF i_depol < 0 AND Vmi-1 < Vm_thr AND Vmi >= Vm_thr,
      SET i_depol = i
    END IF
    IF i_repol < 0 AND Vmi-1 >= Vm_thr AND Vmi < Vm_thr,
      SET i_repol = i
    END IF
  END FOREACH
  # Note 4: To avoid spurious Vm crossings, it may be necessary to validate by ensuring
  # that Vm stays above/below V_thr for some length of time (e.g., 1 ms)

  # Finally, calculate SF as a maximization over the identified trans-threshold interval:
  set SFmax = -1
  FOREACH i FROM i_depol+1 TO i_repol,
    SET Qnet = integrate( Im, i_depol, i, dt )
    # Note 5: a simple numerical integrator is OK (e.g., rectangle/trapezoid methods)

    SET Qthr = Qthr_tA_CI( dt * (i - i_depol), dt*i_depol - last_act )
    # Note 6: see text + Fig. S2 for detailed information on estimating Qthr(tA,CI)

    IF Qnet / Qthr > SFmax,
      set SFmax = Qnet / Qthr
    END IF
  END FOREACH

  # All done!
  print SFmax

END CalcSF
```
